# Supplementary material for: Single-session tDCS over the dominant hemisphere affects contralateral spectral EEG power, but does not enhance neurofeedback-guided event-related desynchronization of the non-dominant hemisphere's sensorimotor rhythm
Source: PubMed Central journal article supplement (PMC5841755; doi:10.1371/journal.pone.0193004), 2018-03-07
Supplement: pone.0193004.s002.pdf [file pone.0193004.s002.pdf]

**S2 Table. Results of ANOVA tests for spectral power analysis.** The table shows the complete results of the multiway ANOVA tests performed on spectral power in the two groups (cathodal and anodal) and conditions (rest or motor imagery). The factors included in the analysis were *time*, *stimulation*, *frequency band*, *subject* (between-subject factors) and *electrodes* (within-subject factor).

| CATHODAL                         |         |    |                       | ANODAL                           |         |    |                       |
|----------------------------------|---------|----|-----------------------|----------------------------------|---------|----|-----------------------|
| condition: “reference”           |         |    |                       | condition: “reference”           |         |    |                       |
| Factor                           | F-value | df | p-value               | Factor                           | F-value | df | p-value               |
| <i>Time</i>                      | 49.9    | 2  | $2.7 \cdot 10^{-22}$  | <i>Time</i>                      | 8.81    | 2  | $1.5 \cdot 10^{-4}$   |
| <i>Stimulation</i>               | 0.79    | 1  | 0.37                  | <i>Stimulation</i>               | 27.3    | 1  | $1.7 \cdot 10^{-7}$   |
| <i>Frequency band</i>            | 88.1    | 3  | $2.7 \cdot 10^{-56}$  | <i>Frequency band</i>            | 3.74    | 3  | 0.011                 |
| <i>Subject</i>                   | 117     | 9  | $1.3 \cdot 10^{-109}$ | <i>Subject</i>                   | 22.2    | 9  | $1.7 \cdot 10^{-38}$  |
| <i>Electrodes</i>                | 41.3    | 11 | $2.9 \cdot 10^{-90}$  | <i>Electrodes</i>                | 9.45    | 11 | $2.9 \cdot 10^{-17}$  |
| <i>Time</i> × <i>stimulation</i> | 0.34    | 2  | 0.72                  | <i>Time</i> × <i>stimulation</i> | 21.7    | 2  | $3.7 \cdot 10^{-10}$  |
| condition: “motor imagery”       |         |    |                       | condition: “motor imagery”       |         |    |                       |
| Factor                           | F-value | df | p-value               | Factor                           | F-value | df | p-value               |
| <i>Time</i>                      | 62.6    | 2  | $9.3 \cdot 10^{-28}$  | <i>Time</i>                      | 26.6    | 2  | $1.9 \cdot 10^{-13}$  |
| <i>Stimulation</i>               | 1.98    | 1  | 0.16                  | <i>Stimulation</i>               | 90.2    | 1  | $1.9 \cdot 10^{-21}$  |
| <i>Frequency band</i>            | 157     | 3  | $2.2 \cdot 10^{-99}$  | <i>Frequency band</i>            | 30.2    | 3  | $2.0 \cdot 10^{-19}$  |
| <i>Subject</i>                   | 237     | 9  | 0                     | <i>Subject</i>                   | 33.5    | 9  | $1.0 \cdot 10^{-58}$  |
| <i>Electrodes</i>                | 109     | 11 | $1.4 \cdot 10^{-249}$ | <i>Electrodes</i>                | 64.3    | 11 | $4.1 \cdot 10^{-144}$ |
| <i>Time</i> × <i>stimulation</i> | 3.52    | 2  | 0.029                 | <i>Time</i> × <i>stimulation</i> | 26.5    | 2  | $7.2 \cdot 10^{-14}$  |
